# Supplementary material for: The Influence of Menstrual Cycle Phases on Maximal Strength Performance in Healthy Female Adults: A Systematic Review with Meta-Analysis
Source: MDPI journal article supplement (doi:10.3390/sports12010031), 2024-01-12
Supplement: s1 [file s1]

**Table S2.** Modified Downs and Black checklist according to McNulty et al. (2020)

|                                                                                                                                                                                                    | Arazi et al. (2018) | Bambaiechi et al. (2009) | Dasa et al. (2021) | Dibrezzo et al. (1988) | Drake et al. (2003) | Ekenros et al. (2013) | Elliot et al. (2003) | Farouzandeh Sharaki et al. (2020) | Fridén et al. (2003) | Gordon et al. (2013) | Hoshi (1996) | Janse de Jonge et al. (2001) | Koese (2018) | Kubo et al. (2009) | Lebrun et al. (1995) | Miyazaki et al. (2022) | Montgomery & Shultz (2010) | Pallavi et al. (2017) | Poumasiri et al. (2023) | Rodrigues et al. (2019) | Romero-Moraleda et al. (2019) | Tenan et al. (2016) |
|----------------------------------------------------------------------------------------------------------------------------------------------------------------------------------------------------|---------------------|--------------------------|--------------------|------------------------|---------------------|-----------------------|----------------------|-----------------------------------|----------------------|----------------------|--------------|------------------------------|--------------|--------------------|----------------------|------------------------|----------------------------|-----------------------|-------------------------|-------------------------|-------------------------------|---------------------|
| Q1. Is the hypothesis/aim/objective of the study clearly described?<br>Yes = 1 / No = 0                                                                                                            | 1                   | 1                        | 1                  | 1                      | 1                   | 1                     | 1                    | 1                                 | 1                    | 1                    | 1            | 1                            | 1            | 1                  | 1                    | 1                      | 1                          | 0                     | 1                       | 1                       | 1                             | 1                   |
| Q2. Are the main outcomes to be measured clearly described in the introduction or methods section? If the main outcomes are first mentioned in the results section, answer no.<br>Yes = 1 / No = 0 | 0                   | 0                        | 0                  | 0                      | 1                   | 1                     | 1                    | 1                                 | 0                    | 1                    | 0            | 1                            | 0            | 1                  | 1                    | 1                      | 1                          | 0                     | 0                       | 0                       | 0                             | 0                   |
| Q3. Are the characteristics of the participants included in the study clearly described?<br>Yes = 1 / No = 0 / Unable to determine = 0                                                             | 1                   | 1                        | 1                  | 1                      | 1                   | 1                     | 1                    | 1                                 | 1                    | 1                    | 1            | 1                            | 1            | 1                  | 1                    | 1                      | 1                          | 1                     | 1                       | 1                       | 1                             | 1                   |

[illegible]

|                                                                                                                                                                                                                                                                                                                                                                           |     |    |     |    |    |     |    |    |     |    |     |     |    |     |     |    |     |    |    |    |    |    |
|---------------------------------------------------------------------------------------------------------------------------------------------------------------------------------------------------------------------------------------------------------------------------------------------------------------------------------------------------------------------------|-----|----|-----|----|----|-----|----|----|-----|----|-----|-----|----|-----|-----|----|-----|----|----|----|----|----|
| Q10. If any of the results of the study were based on 'data dredging' was this made clear? Any analyses that had not been planned at the outset should be clearly indicated. If no retrospective subgroup analyses were reported, then answer yes.<br>Yes = 1 / No = 0 / Unable to determine = 0                                                                          | 0   | 1  | 0   | 1  | 1  | 1   | 1  | 1  | 1   | 1  | 1   | 1   | 1  | 1   | 1   | 1  | 1   | 1  | 0  | 0  | 1  | 1  |
| Q11. Were statistical tests used to assess the main outcomes appropriate? The statistical techniques used must be appropriate to the data and the research question.<br>Yes = 1 / No = 0 / Unable to determine = 0                                                                                                                                                        | 1   | 1  | 1   | 0  | 1  | 1   | 1  | 1  | 1   | 1  | 0   | 1   | 1  | 1   | 1   | 1  | 1   | 1  | 1  | 1  | 1  | 1  |
| Q12. Were the main outcome measures used accurate (i.e., valid and reproducible)? For studies where the validity and reproducibility of outcome measures are clearly described, the question should be answered yes. For studies which refer to other work that demonstrates the outcome measures are accurate, answer yes.<br>Yes = 1 / No = 0 / Unable to determine = 0 | 0   | 1  | 1   | 0  | 0  | 1   | 0  | 0  | 1   | 1  | 0   | 1   | 1  | 1   | 1   | 1  | 1   | 0  | 0  | 1  | 1  | 0  |
| Q13. Was the order of phase testing randomised?<br>Yes = 1 / No = 0 / Unable to determine = 0                                                                                                                                                                                                                                                                             | 1   | 1  | 1   | 0  | 0  | 0   | 1  | 1  | 1   | 1  | 1   | 0   | 1  | 1   | 1   | 1  | 1   | 1  | 0  | 1  | 1  | 1  |
| Q14. Did the study have sufficient power to detect an a priori specified scientifically important effect at a pre-determined probability threshold? Answer yes if they included a power calculation, and no if not.<br>Yes = 1 / No = 0                                                                                                                                   | 0   | 0  | 0   | 0  | 0  | 1   | 0  | 0  | 0   | 0  | 0   | 0   | 0  | 0   | 1   | 1  | 0   | 0  | 0  | 0  | 0  | 0  |
| Q15. Was study retention > 85%?<br>Yes = 1 / No = 0 / Unable to determine = 0                                                                                                                                                                                                                                                                                             | 0   | 0  | 0   | 0  | 0  | 0   | 0  | 0  | 0   | 0  | 0   | 0   | 0  | 0   | 0   | 0  | 1   | 0  | 0  | 1  | 0  | 0  |
| Q16. Identify if menstrual cycle phase was confirmed using blood samples. If yes, the a priori rating is maintained and this is the final study quality rating. If not, the study is downgraded a level (e.g., a study that started out as high, drops to moderate).                                                                                                      | Yes | No | Yes | No | No | Yes | No | No | Yes | No | Yes | Yes | No | Yes | Yes | No | Yes | No | No | No | No | No |

|                                                                                                                                                                                                                                                                                                                                                 |          |             |          |              |             |          |             |             |          |             |          |          |             |          |          |             |          |              |              |              |             |              |
|-------------------------------------------------------------------------------------------------------------------------------------------------------------------------------------------------------------------------------------------------------------------------------------------------------------------------------------------------|----------|-------------|----------|--------------|-------------|----------|-------------|-------------|----------|-------------|----------|----------|-------------|----------|----------|-------------|----------|--------------|--------------|--------------|-------------|--------------|
| Q17. Identify if menstrual cycle phase was confirmed using ovulation kits. If yes, the Q1. rating is maintained. If no, the study is downgraded another level (e.g., a study that started out high, drops to low). This means that the maximum rating that any study that does not use blood analysis or ovulation kits is “low” or “very low”. | Yes      | Yes         | Yes      | No           | Yes         | Yes      | Yes         | Yes         | Yes      | Yes         | Yes      | Yes      | No          | Yes      | Yes      | Yes         | Yes      | No           | No           | No           | Yes         | No           |
| Rating                                                                                                                                                                                                                                                                                                                                          | Maintain | 1 Downgrade | Maintain | 2 Downgrades | 1 Downgrade | Maintain | 1 Downgrade | 1 Downgrade | Maintain | 1 Downgrade | Maintain | Maintain | 2 Downgrade | Maintain | Maintain | 1 Downgrade | Maintain | 2 Downgrades | 2 Downgrades | 2 Downgrades | 1 Downgrade | 2 Downgrades |
| A priori                                                                                                                                                                                                                                                                                                                                        | low      | moderate    | moderate | low          | low         | moderate | Moderate    | moderate    | moderate | moderate    | low      | moderate | moderate    | moderate | moderate | moderate    | high     | low          | low          | moderate     | moderate    | moderate     |
| Final classification                                                                                                                                                                                                                                                                                                                            | low      | low         | moderate | very low     | very low    | moderate | low         | low         | moderate | low         | low      | moderate | very low    | moderate | moderate | low         | high     | very low     | very low     | very low     | low         | very low     |
